# Supplementary material for: Burkholderia cenocepacia and Salmonella enterica ArnT proteins that transfer 4-amino-4-deoxy-l-arabinose to lipopolysaccharide share membrane topology and functional amino acids
Source: PubMed Central journal article supplement (PMC5377068; doi:10.1038/srep10773), 2015-06-01
Supplement: srep10773-s1.pdf [file srep10773-s1.pdf]

## SUPPLEMENTARY INFORMATION

### ***Burkholderia cenocepacia* and *Salmonella enterica* ArnT proteins that transfer 4-amino-4-deoxy-L-arabinose to lipopolysaccharide share membrane topology and functional amino acids**

Faviola Tavares-Carreón<sup>1</sup>, Kinnari B. Patel<sup>2</sup> and Miguel A. Valvano<sup>1,2\*</sup>

<sup>1</sup>Centre for Human Immunology, Department of Microbiology and Immunology, University of Western Ontario, London, Ontario, Canada, N6A 5C1; <sup>2</sup>Centre for Infection and Immunity, Queen's University Belfast, Belfast, United Kingdom, BT9 5AE

\* Correspondence and requests for materials should be addressed to M.A.V (m.valvano@qub.ac.uk)

## Supplementary figures

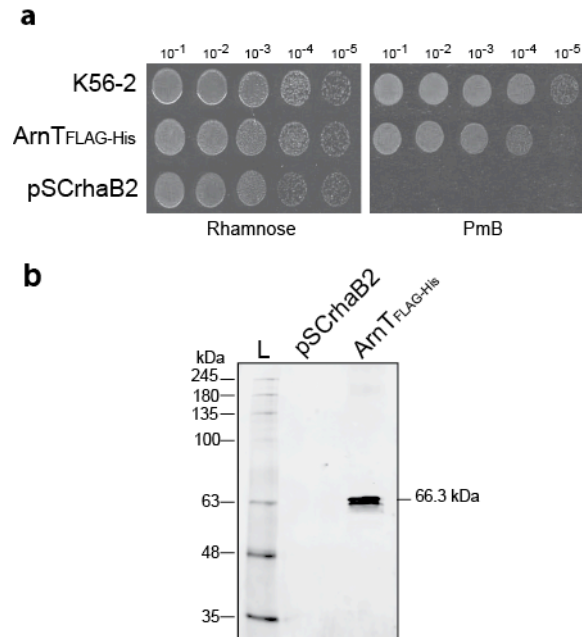

**FIGURE S1** | Polymyxin B resistant phenotype is restored by ArnT<sub>FLAG+10xHis</sub> in  $\Delta arnT-arnBC^+$  carrying the lptG<sub>D31H</sub> suppressor mutation. (a) The strain  $\Delta arnT-arnBC^+$  was transformed with pFT3 encoding ArnT<sub>FLAG+10xHis</sub> under the control of the rhamnose inducible promoter or pSCrhaB2 (vector control). K556-2 is the parental strains carrying the wild-type *arnT* (positive control). 10-fold serial dilutions of the transformants were spotted on LB supplemented with 0.4% of rhamnose and 10- $\mu$ g ml<sup>-1</sup> PmB. (b) Total membrane preparation from  $\Delta arnT-arnBC^+$  expressing ArnT<sub>FLAG-10xHis</sub> and pSCrhaB2 as a vector control. Ten  $\mu$ g of protein was analyzed by SDS-PAGE, and the immunoblot was probed with the antibody anti-FLAG. L, BLUEye prestained protein ladder

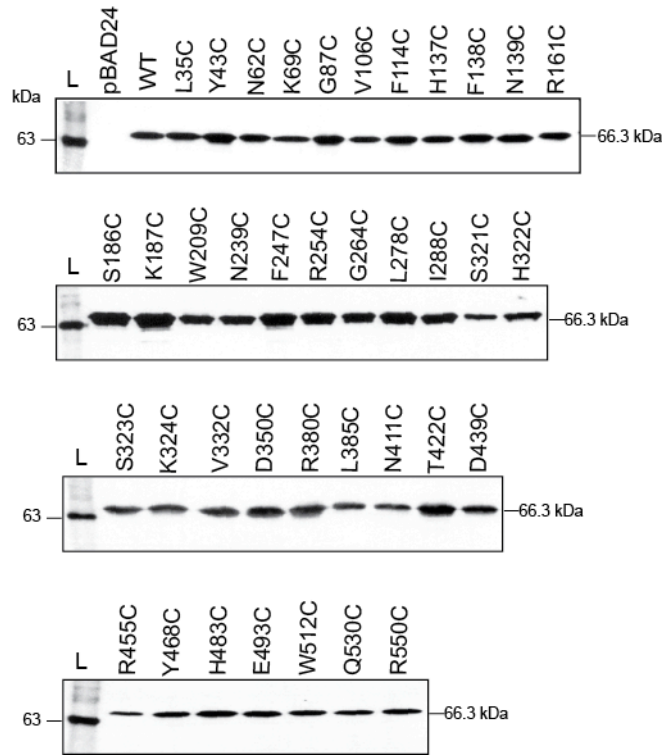

**FIGURE S2 | Protein expression of ArnT cysteine replacement.** ArnT<sub>FLAG-10xHis</sub> cysteine derivatives were expressed from the arabinose-inducible vector pBAD24. Twenty  $\mu$ l of total protein preparations from DH5 $\alpha$  cells were separated by 12% SDS-PAGE and the ArnT mutant proteins detected by immunoblot with an anti-FLAG monoclonal antibody.

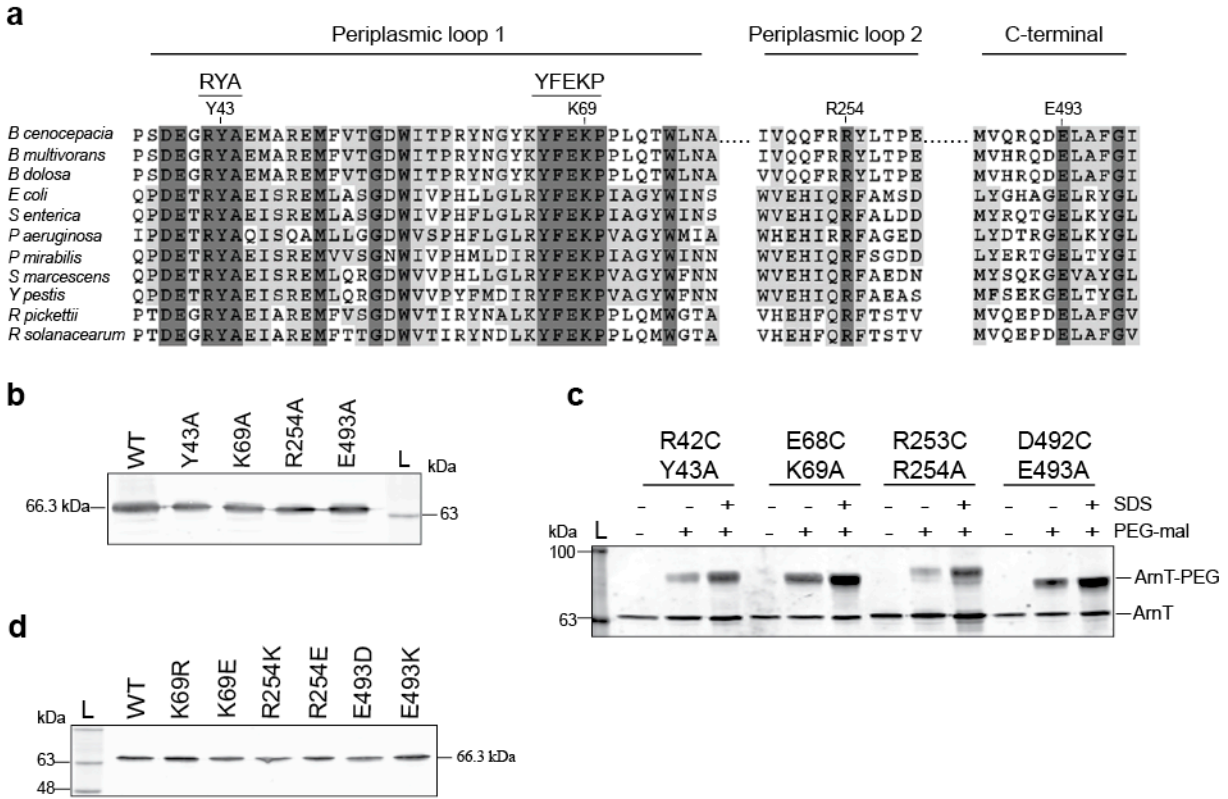

**FIGURE S3** | Highly conserved residues of ArnT are required for activity. (a) alignment of partial sequences of ArnT from different bacteria showing RYA and YFEKP motifs and highly conserved Y43, K69, R254, and E493. (b-d) Immunoblot of ArnT proteins containing replacements in functional residues detected anti-FLAG. (c) *E. coli* DH5 $\alpha$  carrying plasmids encoding ArnT cysteine replacements were grown to mid-exponential phase and protein expression induced with 0.2% L-arabinose. Cells were harvest and resuspend in 0.3 ml of HEPES/MgCl<sub>2</sub> buffer. 0.1 ml of cell suspension was incubated with buffer alone or 1 mM PEG-mal with or without 2% SDS for 1h at room temperature. Reactions were quenched with 45 mM DTT, and proteins were separated by SDS-PAGE and transferred to nitrocellulose membrane. ArnT derivatives were detected with anti-FLAG. L, molecular masses of protein standards.

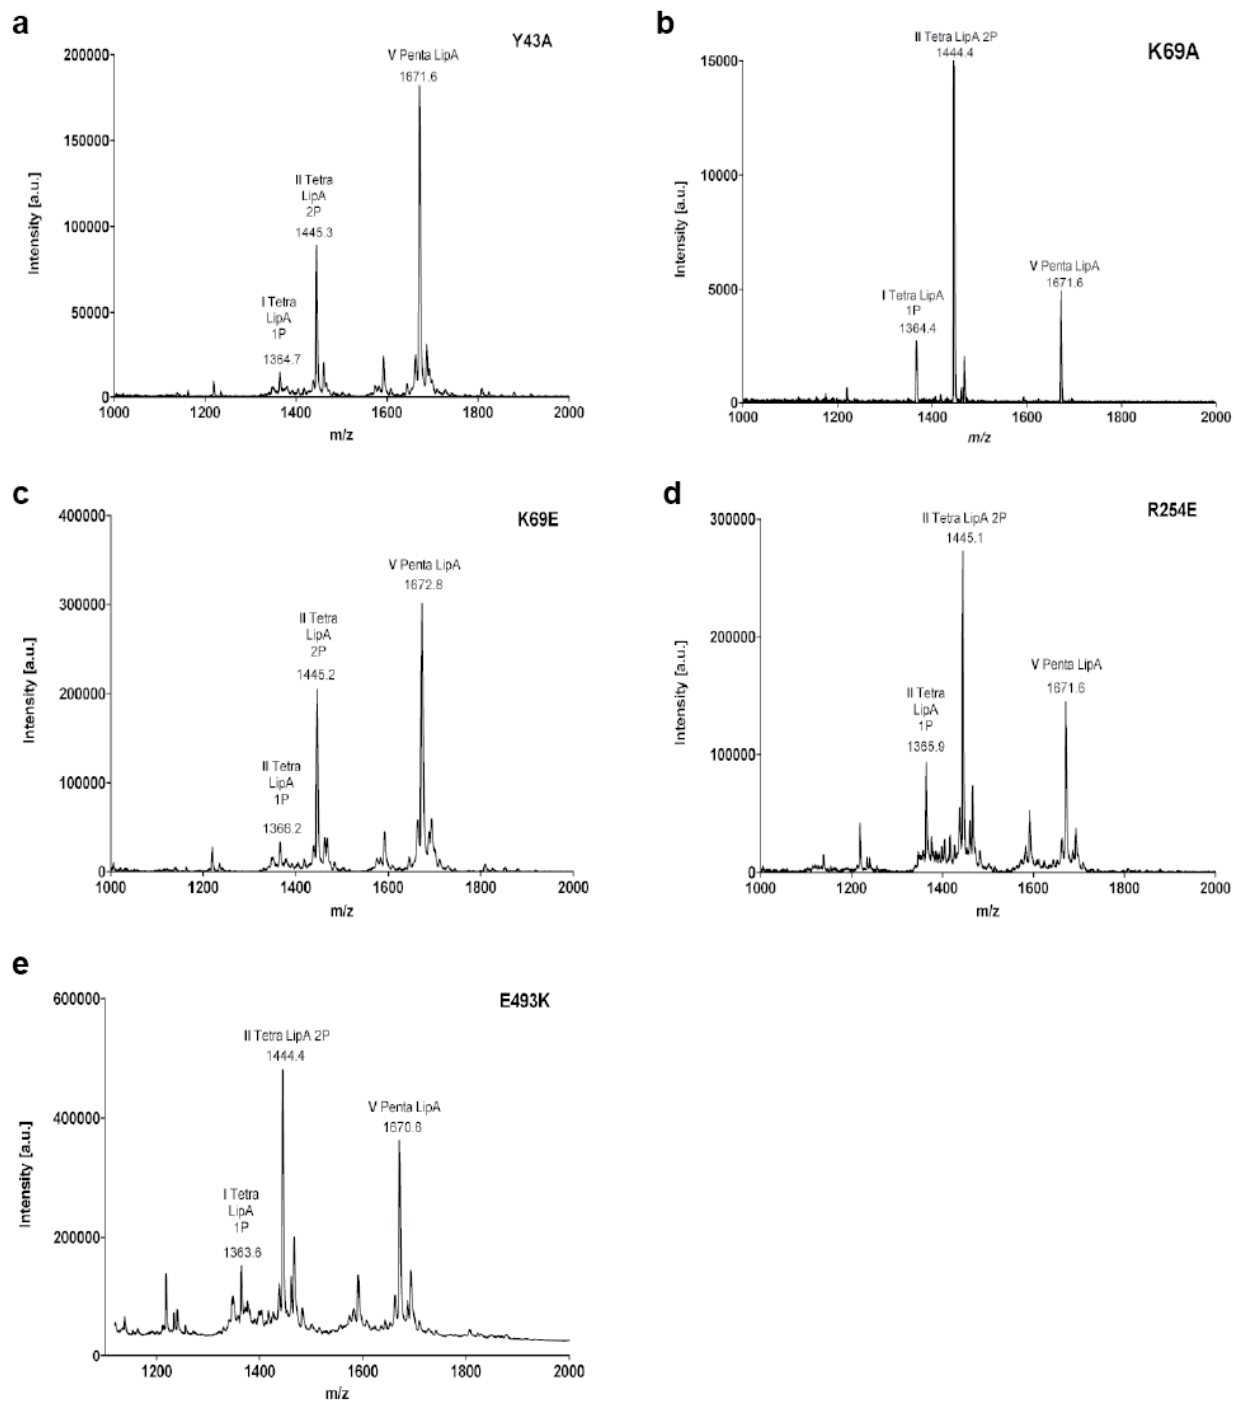

**FIGURE S4** | MALDI-TOF spectra of purified lipid A produced by *arnT* mutants that did not present L-Ara4N molecule. The profiles represented were obtained using the negative ion mode. I-II Tetra-acylated lipid A with one or two phosphates molecules. V, Penta-acylated lipid A.

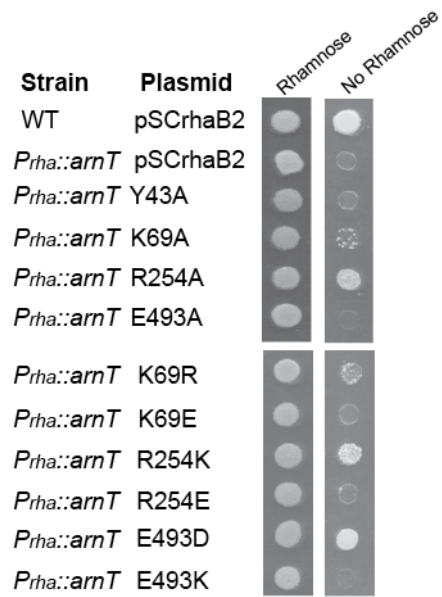

**FIGURE S5** | *arnT* mutants cannot rescue growth of *B. cenocepacia* without L-Ara4N synthesis.

Plasmids encoding the various ArnT derivatives were introduced into the conditional mutant strain

*P<sub>rha</sub>::arnT*<sup>1</sup>. Dilutions were spotted in LB plate with or without 0.4% rhamnose.

## Supplementary Tables

Table S1 | Strains used in this study.

| Strain or Plasmid     | Relevant Properties                                                                                                                                           | Source or Reference                        |
|-----------------------|---------------------------------------------------------------------------------------------------------------------------------------------------------------|--------------------------------------------|
| <b>Strains</b>        |                                                                                                                                                               |                                            |
| <i>E. coli</i>        |                                                                                                                                                               |                                            |
| DH5 $\alpha$          | F <sup>-</sup> $\phi$ 80 <i>lacZ</i> M15 <i>endA recA hsdR</i> (r <sub>k</sub> m <sub>k</sub> ) <i>supE thi gyrA relA</i> $\Delta$ ( <i>lacZYA-argF</i> )U169 | Laboratory stock                           |
| $\Delta$ <i>arnT</i>  | BL21(DE3) $\Delta$ <i>arnT</i>                                                                                                                                | 2                                          |
| CC118                 | $\Delta$ ( <i>ara leu</i> ) $\Delta$ <i>lac phoA galE galk thi rpsL rpsB argE recA</i>                                                                        | Laboratory stock                           |
| <i>B. cenocepacia</i> |                                                                                                                                                               |                                            |
| K56-2                 | Parental strain, clinical isolate of the ET12 clone                                                                                                           | BCRRC <sup>a</sup> 3                       |
| MH45                  | K56-2, <i>P<sub>rha</sub>::arnT</i>                                                                                                                           | 1                                          |
| MH55                  | $\Delta$ <i>arnT-arnBC</i> <sup>+</sup> <i>lptG</i> <sub>D31H</sub> , <i>lptG</i> suppressor strain                                                           | 1                                          |
| <b>Plasmids</b>       |                                                                                                                                                               |                                            |
| pAH01                 | pBAD vector expressing Flag-Wzx-K367-PhoA                                                                                                                     | 4                                          |
| pAH18                 | pBAD vector inducible with arabinose, encoding an N-terminal FLAG and C-terminal for PhoA fusion.                                                             | 4                                          |
| pAH1809               | pBAD vector expressing Flag-Wzx-T242-PhoA                                                                                                                     | 4                                          |
| pBAD24                | Expression vector inducible with arabinose, for C-terminal FLAG-10xHis fusions, Ap <sup>R</sup>                                                               | 5                                          |
| pHASoxYZ              | <i>E. coli</i> <i>tatA</i> promoter controlling expression of <i>P. panthotrophus</i> HA- <i>soxY</i> and <i>soxZ</i> in pSU20, Cm <sup>R</sup>               | 6                                          |
| pMH494                | pSCrhaB2- <i>arnT</i> <sub>Se</sub>                                                                                                                           | Hamad and Valvano, <i>in preparation</i> . |
| pRK2013               | Helper plasmid used for bacterial conjugation; Km <sup>R</sup>                                                                                                | 7                                          |
| pSCrhaB2              | Expression vector inducible with rhamnose. Broad host range replicative vector; Tp <sup>R</sup>                                                               | 8                                          |
| pFT1                  | pBAD expressing ArnT <sub>-FLAG-10xHis</sub>                                                                                                                  | This study                                 |
| pFT3                  | pSCrhaB2, ArnT <sub>FLAG-10xHis</sub>                                                                                                                         | This study                                 |
| pFT4                  | pAH18, FLAG-ArnT <sub>Bc-PhoA</sub>                                                                                                                           | This study                                 |
| pFT5                  | pFT1, ArnT <sub>C154A</sub>                                                                                                                                   | This study                                 |
| pFT6                  | pFT1, ArnT <sub>C176A</sub>                                                                                                                                   | This study                                 |
| pFT7                  | pFT1, ArnT <sub>Cysless</sub>                                                                                                                                 | This study                                 |
| pFT12                 | pFT3, ArnT <sub>C154A</sub>                                                                                                                                   | This study                                 |
| pFT13                 | pFT3, ArnT <sub>C176A</sub>                                                                                                                                   | This study                                 |
| pFT14                 | pFT3, ArnT <sub>Cysless</sub>                                                                                                                                 | This study                                 |
| pFT15                 | pAH18, FLAG-ArnT <sub>Se-PhoA</sub>                                                                                                                           | This study                                 |
| pFT20                 | pFT7, ArnT <sub>K324C</sub>                                                                                                                                   | This study                                 |
| pFT21                 | pFT7, ArnT <sub>D350C</sub>                                                                                                                                   | This study                                 |
| pFT28                 | pFT7, ArnT <sub>L385C</sub>                                                                                                                                   | This study                                 |
| pFT38                 | pFT7, ArnT <sub>N62C</sub>                                                                                                                                    | This study                                 |

---

|        |                                        |            |
|--------|----------------------------------------|------------|
| pFT39  | pFT7, ArnT <sub>G87C</sub>             | This study |
| pFT40  | pFT7, ArnT <sub>N239C</sub>            | This study |
| pFT41  | pFT7, ArnT <sub>S321C</sub>            | This study |
| pFT46  | pFT7, ArnT <sub>R380C</sub>            | This study |
| pFT47  | pFT7, ArnT <sub>D439C</sub>            | This study |
| pFT48  | pFT7, ArnT <sub>E493C</sub>            | This study |
| pFT52  | pFT7, ArnT <sub>G264C</sub>            | This study |
| pFT54  | pBAD, ArnT <sub>Se (FLAG-10xHis)</sub> | This study |
| pFT55  | pFT7, ArnT <sub>R254C</sub>            | This study |
| pFT56  | pFT7, ArnT <sub>Q530C</sub>            | This study |
| pFT61  | pFT7, ArnT <sub>H137C</sub>            | This study |
| pFT62  | pFT7, ArnT <sub>I288C</sub>            | This study |
| pFT63  | pFT7, ArnT <sub>W209C</sub>            | This study |
| pFT64  | pFT7, ArnT <sub>R544C</sub>            | This study |
| pFT70  | pFT54, ArnT <sub>Se-C148A/C149A</sub>  | This study |
| pFT72  | pFT7, ArnT <sub>N411C</sub>            | This study |
| pFT73  | pFT7, ArnT <sub>W512C</sub>            | This study |
| pFT76  | pFT7, ArnT <sub>L35C</sub>             | This study |
| pFT77  | pFT7, ArnT <sub>K69C</sub>             | This study |
| pFT79  | pFT7, ArnT <sub>F247C</sub>            | This study |
| pFT80  | pFT7, ArnT <sub>Q297C</sub>            | This study |
| pFT86  | pFT7, ArnT <sub>Y43C</sub>             | This study |
| pFT87  | pFT7, ArnT <sub>V106C</sub>            | This study |
| pFT92  | pFT3, ArnT <sub>R254A</sub>            | This study |
| pFT93  | pFT3, ArnT <sub>E493A</sub>            | This study |
| pFT94  | pFT7, ArnT <sub>V332C</sub>            | This study |
| pFT97  | pFT7, ArnT <sub>I309C</sub>            | This study |
| pFT98  | pFT7, ArnT <sub>T422C</sub>            | This study |
| pFT109 | pFT7, ArnT <sub>R550C</sub>            | This study |
| pFT110 | pFT3, ArnT <sub>K69A</sub>             | This study |
| pFT113 | pFT7, ArnT <sub>L278C</sub>            | This study |
| pFT116 | pFT54, ArnT <sub>Se-R506C</sub>        | This study |
| pFT117 | pFT54, ArnT <sub>Se-Q544C</sub>        | This study |
| pFT119 | pFT7, ArnT <sub>H483C</sub>            | This study |
| pFT120 | pFT7, ArnT <sub>Y468C</sub>            | This study |
| pFT121 | pFT3, ArnT <sub>Y43A</sub>             | This study |
| pFT130 | pFT3, ArnT <sub>R254K</sub>            | This study |
| pFT131 | pFT3, ArnT <sub>R254E</sub>            | This study |
| pFT132 | pFT3, ArnT <sub>E493D</sub>            | This study |
| pFT133 | pFT3, ArnT <sub>E493K</sub>            | This study |
| pFT134 | pFT54, ArnT <sub>Se-E438C</sub>        | This study |
| pFT135 | pFT54, ArnT <sub>Se-D469C</sub>        | This study |
| pFT138 | pFT3, ArnT <sub>K69R</sub>             | This study |
| pFT139 | pFT3, ArnT <sub>K69E</sub>             | This study |
| pFT143 | pFT54, ArnT <sub>Se-P546A</sub>        | This study |
| pFT144 | pFT143, ArnT <sub>Se-Y36A</sub>        | This study |
| pFT145 | pFT143, ArnT <sub>Se-K62A</sub>        | This study |
| pFT146 | pFT143, ArnT <sub>Se-E478A</sub>       | This study |
| pFT195 | pFT7, ArnT <sub>R42C-Y43A</sub>        | This study |
| pFT196 | pFT7, ArnT <sub>E682C-K69A</sub>       | This study |
| pFT197 | pFT7, ArnT <sub>R253C-R254A</sub>      | This study |

---



|        |                                   |            |
|--------|-----------------------------------|------------|
| pFT198 | pFT7, ArnT <sub>D492C-E493A</sub> | This study |
| pFT210 | pFT7, ArnT <sub>F138C</sub>       | This study |
| pFT211 | pFT7, ArnT <sub>N139C</sub>       | This study |
| pFT213 | pFT7, ArnT <sub>R161C</sub>       | This study |
| pFT214 | pFT7, ArnT <sub>S186C</sub>       | This study |
| pFT215 | pFT7, ArnT <sub>K187C</sub>       | This study |
| pFT216 | pFT7, ArnT <sub>H322C</sub>       | This study |
| pFT217 | pFT7, ArnT <sub>S323C</sub>       | This study |

<sup>a</sup>*B. cenocepacia* complex Research and Referral Repository for Canadian CF Clinics.

Table 2 | Primers used in this study.

| <b>Primer</b> | <b>DNA Sequence</b>                           | <b>Restriction site</b> |
|---------------|-----------------------------------------------|-------------------------|
| 252           | 5'-GATTAGCGGATCCTACCTGA                       | None                    |
| 258           | 5'-GACCGCTTCTGCGTTCTGAT                       | None                    |
| 6238          | 5'-GCGCTGTCGCTC <u>g</u> gTCGCTGCTGCTCGCGCAG  | None                    |
| 6239          | 5'-CTGCGCGAGCAGCAGCGA <u>c</u> gcGAGCGACAGCGC | None                    |
| 6240          | 5'-GGCTGGATGTGGGCG <u>g</u> gTGGGCCGCGATGGCG  | None                    |
| 6241          | 5'-CGCCATCGCGGCCCA <u>c</u> gcCGCCACATCCAGCC  | None                    |
| 6269          | 5'-aa <u>g</u> aattcATGAACGATACGCCGTCGAGGC    | <i>EcoRI</i>            |
| 6270          | 5'-aa <u>g</u> tcgactcCGATTGCGGTTTCTCGACGATC  | <i>SalI</i>             |
| 6385          | 5'-CAGCGGAACCCCGAGTTCTTCAAC                   | None                    |
| 6421          | 5'-aa <u>g</u> tcgacCGATTGCGGTTTCTCGACGATC    | <i>SalI</i>             |
| 6475          | 5'-aa <u>g</u> aattcATGAAATCGATACGCTATTATC    | <i>EcoRI</i>            |
| 6476          | 5'-aa <u>g</u> tcgactcTTTAGGCCGATACTGAATTAAC  | <i>SalI</i>             |
| 6716          | 5'-aa <u>t</u> ctagagAACGATACGCCGTCGAGGCTAC   | <i>XbaI</i>             |
| 7178          | 5'-aa <u>t</u> ctagagAAATCGATACGCTATTATCTGGC  | <i>XbaI</i>             |
| 7182          | 5'- aa <u>g</u> tcgacTTTAGGCCGATACTGAATTAAC   | <i>SalI</i>             |

Restriction sites are underlined.

## Supplementary References

1. Hamad, M. A., Di Lorenzo, F., Molinaro, A., Valvano, M. A. Aminoarabinose is essential for lipopolysaccharide export and intrinsic antimicrobial peptide resistance in *Burkholderia cenocepacia*. *Mol Microbiol* **85**, 962-974 (2012).
2. Impellitteri, N. A., Merten, J. A., Bretscher, L. E., Klug, C. S. Identification of a functionally important loop in *Salmonella typhimurium* ArnT. *Biochemistry* **49**, 29-35 (2010).
3. Mahenthiralingam, E., *et al.* Diagnostically and experimentally useful panel of strains from the *Burkholderia cepacia* complex. *J Clin Microbiol* **38**, 910-913 (2000).
4. Marolda, C. L., *et al.* Membrane topology and identification of critical amino acid residues in the Wzx O-antigen translocase from *Escherichia coli* O157:H4. *J Bacteriol* **192**, 6160-6171 (2010).
5. Guzman, L. M., Belin, D., Carson, M. J., Beckwith, J. Tight regulation, modulation, and high-level expression by vectors containing the arabinose PBAD promoter. *J Bacteriol* **177**, 4121-4130 (1995).
6. Bauer, J., Fritsch, M. J., Palmer, T., Unden, G. Topology and accessibility of the transmembrane helices and the sensory site in the bifunctional transporter DcuB of *Escherichia coli*. *Biochemistry* **50**, 5925-5938 (2011).
7. Figurski, D. H., Helinski, D. R. Replication of an origin-containing derivative of plasmid RK2 dependent on a plasmid function provided *in trans*. *Proc Natl Acad Sci U S A* **76**, 1648-1652 (1979).
8. Cardona, S. T., Valvano, M. A. An expression vector containing a rhamnose-inducible promoter provides tightly regulated gene expression in *Burkholderia cenocepacia*. *Plasmid* **54**, 219-228 (2005).
